# Supplementary material for: TRIM32-dependent transcription in adult neural progenitor cells regulates neuronal differentiation
Source: PubMed Central journal article supplement — Cell Death Dis. 2013 Dec 19;4(12):e976–. doi: 10.1038/cddis.2013.487 (PMC3877558; doi:10.1038/cddis.2013.487), 2013-12-19
Supplement: cddis2013487x1.pdf [file cddis2013487x1.pdf]

**TRIM32 dependent transcription in adult neural progenitor cells  
regulates neuronal differentiation.**

**- Supplementary Information -**

Anna-Lena Hillje<sup>1, 2#</sup>, Maria Angeliki S. Pavlou<sup>1, 2#</sup>, Elisabeth Beckmann<sup>1, 3#</sup>, Maik M.A. Worlitzer<sup>1</sup>, Lamia'a Bahnassawy<sup>1, 2</sup>, Lars Lewejohann<sup>3</sup>, Thomas Palm<sup>1</sup>, Jens C. Schwamborn<sup>1, 2\*</sup>

<sup>1</sup>Westfälische Wilhelms-Universität Münster, ZMBE, Institute of Cell Biology, Stem Cell Biology and Regeneration Group, Von-Esmarch-Str. 56, D-48149 Münster, Germany

<sup>2</sup> Luxembourg Centre for Systems Biomedicine (LCSB), University of Luxembourg, Esch-Belval, Luxembourg

<sup>3</sup>Westfälische Wilhelms-Universität Münster, Department of Behavioural Biology, Badestrasse 13, D-48149 Muenster, Germany

\* Correspondence: Jens Schwamborn, Westfälische Wilhelms-Universität Münster, ZMBE, Institute of Cell Biology, Stem Cell Biology and Regeneration Group, Von-Esmarch-Str. 56, D-48149 Münster, Germany; Tel.:0049-2 51- 83 – 57183; Fax: 0049-2 51- 83 – 58616; E-Mail: jschwamb@uni-muenster.de

## Supplementary Figure Legends

### **Supplementary figure 1: Only a small fraction of TRIM32 expressing cells is in the cell cycle.**

a) Electrophoresis following RT-qPCR (of figure 1b). RNase free water was used as a negative control.

b) Immunostainings of mouse brain sections showing the SVZ (upper panel) or the RMS (lower panel) labeled with the indicated antibodies. Right columns show higher magnification of indicated areas. Scale bars 20  $\mu\text{m}$ , for high magnifications 10  $\mu\text{m}$ . c) Diagram showing the percentage of Ki67+ cells that are either TRIM32 positive (TRIM32 pos.) or TRIM32 negative (TRIM32 neg.) (mean  $\pm$  SEM, , t-test.  $P < 0.05$ ,  $n \geq 330$  cells,  $N \geq 3$  mice). d) Immunostainings of mouse brain sections showing the SVZ labeled with the indicated antibodies. Upper right columns show higher magnifications of indicated areas. Scale bars 20  $\mu\text{m}$ , for high magnifications 10  $\mu\text{m}$ . e) Diagram showing the percentage of PH3+ cells that are either positive (TRIM32 pos.) or TRIM32 negative (TRIM32 neg.) (mean  $\pm$  SEM,  $n \geq 40$  cells, t-test.  $P < 0.05$ ).

f) – h) Immunostainings of mouse brain sections f) cortex; g) Olfactory bulb; h) corpus callosum, labeled with the indicated antibodies. Middle and right columns show higher magnification of indicated areas. Scale bars 20  $\mu\text{m}$ , for high magnifications 10  $\mu\text{m}$ .

i) – m) Immunostainings of mouse brain sections from the indicated region labeled with the indicated antibodies . The right columns show higher magnifications of

selected adult generated (EdU positive) cells. Scale bars 15  $\mu\text{m}$  for i), 20  $\mu\text{m}$  for j) – m). For high magnification 20  $\mu\text{m}$ .

n) - o) Confocal images of the GCL or GL from immunostainings of mouse OB sections labeled with the indicated antibodies. In p) the middle and right columns show higher magnification. Scale bars 40  $\mu\text{m}$  for n) and o). For p) 10  $\mu\text{m}$ .

q-s) Immunostainings of mouse brain sections labeled with the indicated antibodies are shown. The right columns show higher magnification of selected cells. Scale bars 10  $\mu\text{m}$ , for q) higher magnification 5  $\mu\text{m}$ .

t) - u) Immunostainings of Marmoset (t) and Macaque (u) OB sections labeled with the indicated antibodies. Right columns show higher magnification of indicated areas. Scale bars 10  $\mu\text{m}$ .

**Supplementary figure 2: Loss of TRIM32 does not affect the amount of newborn cells in the GL. Relate to Figure 4.**

a) Schematic drawing of the experimental paradigm. For three days mice received a daily injection of BrdU, 14 days later the brains were fixed and analyzed. b) Immunostainings of sections from wild-type and TRIM32 knock-out mice OB-GL labeled with the indicated antibodies. Scale bars 25  $\mu\text{m}$ , high magnifications 10  $\mu\text{m}$ .

**Supplementary figure 3: After knock-down of TRIM32, dividing cells are detectable even in the distal RMS. Relate to Figure 5.**

a) – b) N2a cells were transfected with plasmids coding for scrambled shRNA sequences (control) or shRNAs against TRIM32 (shRNA-1, shRNA-2) or with

retroviruses carrying the scrambled shRNA sequences (control) or shRNAs against TRIM32 (shRNA-1, shRNA-2). All constructs express GFP under an independent promoter. Protein levels of TRIM32 can successfully be reduced by knockdown with shRNA. Reduction of TRIM32 protein levels by two different shRNAs shown by Western Blot (a) and immunostainings of cultured N2A cells (b). For Western Blot and immunostainings the indicated antibodies have been used. In b) the right columns show higher magnification of indicated areas. Scale bars 10  $\mu\text{m}$ , for higher magnifications 5  $\mu\text{m}$ .

c) Following the verification that the retroviruses are able to transduce cells *in vitro*, they were injected to the SVZ of adult mice. Eight days after viral injection brain sections were obtained and immunostainings were performed in order to examine TRIM32 levels. On the right part of figure c, higher magnification of the indicated area is shown. Scale bars 20  $\mu\text{m}$ , higher magnifications 10  $\mu\text{m}$ . These results indicate that the utilized shRNAs mediate a knockdown of TRIM32 and that the used anti-TRIM32 antibodies are specific for TRIM32.

d) Viruses for expression of a scrambled shRNA sequence (control), TRIM32-shRNA or overexpression of TRIM32 were injected in the SVZ. Eight days after injection brain sections were analyzed. Immunostainings of mouse brain sections, taken from the distal RMS and labeled with the indicated antibodies are shown. Boxed areas are shown in higher magnification. Scale bars 35  $\mu\text{m}$ , for high magnifications 10  $\mu\text{m}$  (overlay) and 15  $\mu\text{m}$  (individual channels). Only after knock-down of TRIM32 mitotic cells (condensed chromatin in the DNA staining) are detectable in the distal RMS.

**Supplementary figure 4: Correct induction of neuronal differentiation depends on presence of TRIM32. Relate to Figure 5.**

Viruses for expression of a scrambled shRNA sequence (control), TRIM32-shRNA or overexpression of TRIM32 were injected in the SVZ. All constructs express GFP under an independent promoter. Eight days after injection brain sections were analyzed. a) TuJ1 was used as an early neuronal differentiation marker. A quantification of GFP positive cells that are also positive for TuJ1, summarizing all brain regions is shown. b) – d) Immunostainings of mouse brain sections, taken from the SVZ and labeled with the indicated antibodies. Boxed areas are shown in higher magnification. Red arrows indicate transduced cells that are positive for TuJ1. Scale bars 30  $\mu$ m, for higher magnifications 10  $\mu$ m. e) Quantification of GFP positive cells in the SVZ which are also positive for TuJ1 (mean $\pm$  SEM,  $n \geq 500$ ;  $N \geq 8$  mice, Mann-Whitney U test, \* $P < 0.05$ ; \*\* $P < 0.01$ ).

f) – h) Immunostainings of mouse brain sections, taken from the proximal RMS and labeled with the indicated antibodies. Boxed areas are shown in higher magnification. Red arrows indicate transduced cells that are positive for TuJ1. Scale bars 30  $\mu$ m, for higher magnifications 10  $\mu$ m. i) Quantification of GFP positive cells in the proximal RMS which are also positive for TuJ1 (mean $\pm$  SEM,  $n \geq 500$ ;  $N \geq 8$  mice, Mann-Whitney U test, \* $P < 0.05$ ).

**Supplementary figure 5: Loss of TRIM32 leads to TuJ1 negative cells in the RMS. Relate to Figure 6.**

Viruses for expression of a scrambled shRNA sequence (control), TRIM32-shRNA or overexpression of TRIM32 were injected in the SVZ. All constructs express GFP

under an independent promoter. Eight days after injection brain sections were analyzed. Immunostainings of mouse brain sections, taken from the middle RMS and labeled with the indicated antibodies are shown in a) and b). Boxed areas are shown in higher magnification. Scale bars 30  $\mu\text{m}$ , for high magnifications 10  $\mu\text{m}$ . Red arrows indicate transduced cells that are positive for TuJ1. Only after knock-down of TRIM32 TuJ1 negative cells (usually with a round shape) are detectable in the middle RMS (b).

**Supplementary figure 6: Gene Ontology (GO) term analysis of the 676 transcripts exclusively associated with loss of TRIM32. Relate to Figure 7.**

a) 676 transcripts were exclusively regulated in TRIM32 knock-out mice and are therefore specifically associated to loss of TRIM32 (see Figure 7). A gene Ontology (GO) term analysis of the 676 transcripts exclusively associated to loss of TRIM32 is shown. The bar diagram represents the  $\log(1/\text{p-value})$ . The p-value was calculated based on the Fisher's exact test.

b) Immunostainings of brain sections (wild-type and TRIM32 knock-out as indicated), taken from the OB (GCL, EPL and GL) and labeled with the indicated antibodies. Scale bars 45  $\mu\text{m}$ , for high magnifications 10  $\mu\text{m}$ . Only in the TRIM32 knock-out mitotic cells (condensed chromatin) are detectable. These cells are shown in higher magnification.

## **Supplementary Table Legends**

**Supplementary Table 1: TRIM32 expression is upregulated in cell types committed to the neuronal lineage. Relate to Figure 1 and Supplementary Figure S1.**

Quantification of double-positive cells of immunostainings co-stained for TRIM32 with the according cell type markers in the indicated areas of the SVZ –OB system (mean  $\pm$  STDE),  $n > 140$  cells for each marker. Abbreviations are as follows: SVZ= subventricular zone, RMS= rostral migratory stream, PRMS= proximal migratory stream, MRMS= middle rostral migratory stream, DRMS= distal migratory stream, GCL= granular cell layer, CC= corpus callosum, OB= olfactory bulb.

**Supplementary Table 2: Loss of TRIM32 results in an increase of newborn neurons and a decreased rate of apoptosis. Relate to Figure 4.**

a) Absolute numbers of BrdU positive cells per GCL in wild-type (+/+) and TRIM32 knock-out mice (-/-). b) Quantification of cells that are double positive for BrdU and the neuronal marker NeuN per GCL. Quantification of cells that are positive for TUNEL (c) or Casp3 (d) in the GCL of wild-type and TRIM32 knock-out mice. N= 4 mice.

**Supplementary Table 3: Loss of TRIM32 leads to more mitotically active cells.**

**Relate to figure 7.**

Quantification of absolute cell number for Ki67 positive cells on wt and TRIM32 ko mice through the different brain regions. N= 4 mice.

**Supplementary Table 4: Loss of TRIM32 leads to deregulated expression of Cyclins, CDKs and Bcl-2 family members. Relate to figure 7.**

Loss of TRIM32 leads to a deregulation of genes involved in cell cycle control and apoptosis. Based on microarray data, the relative expression difference (comparison in the expression change in the RMS from proximal to distal in wild-type versus TRIM32 knock-out) was calculated. First, for each genotype (i.e. WT or Trim32 knock-out), the proximal expression level was set to 100% and distal expression changes were calculated in relation. In a second step, these relative changes, were compared between both genotypes [cut-off difference 20%]. Expression changes for cyclin dependent kinase (cdk) inhibitors, cyclins and Bcl-2 family members are shown.

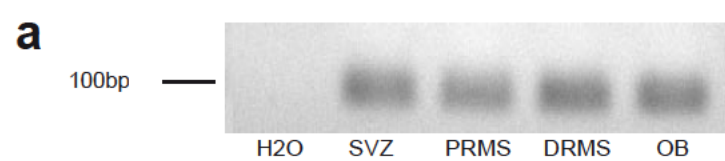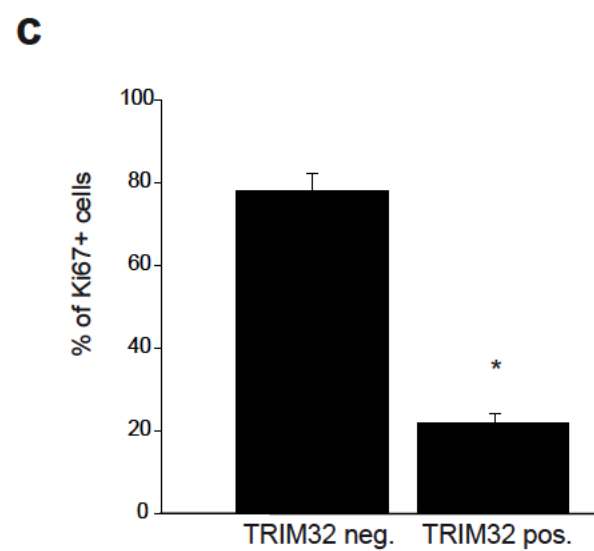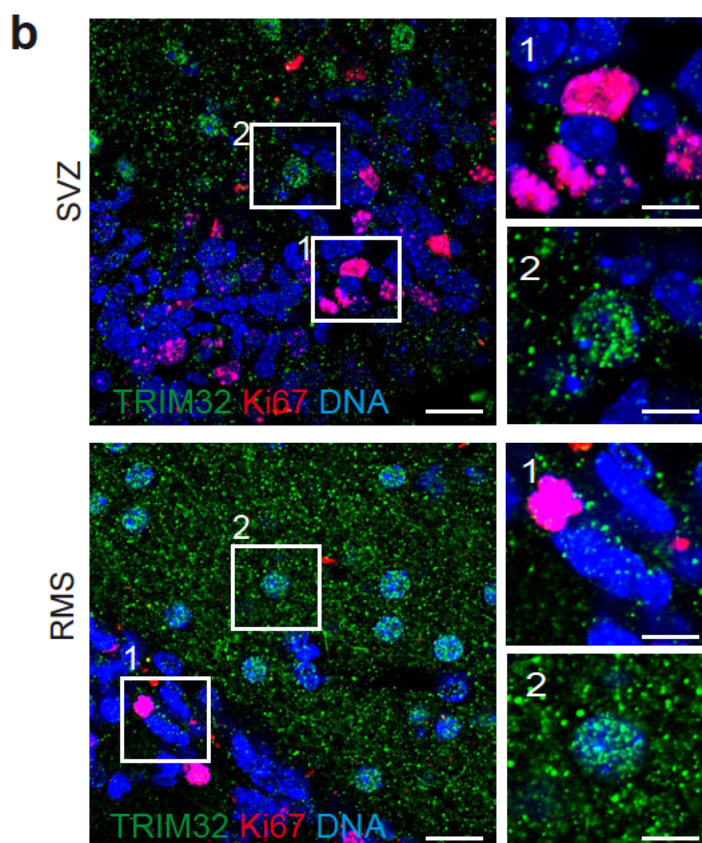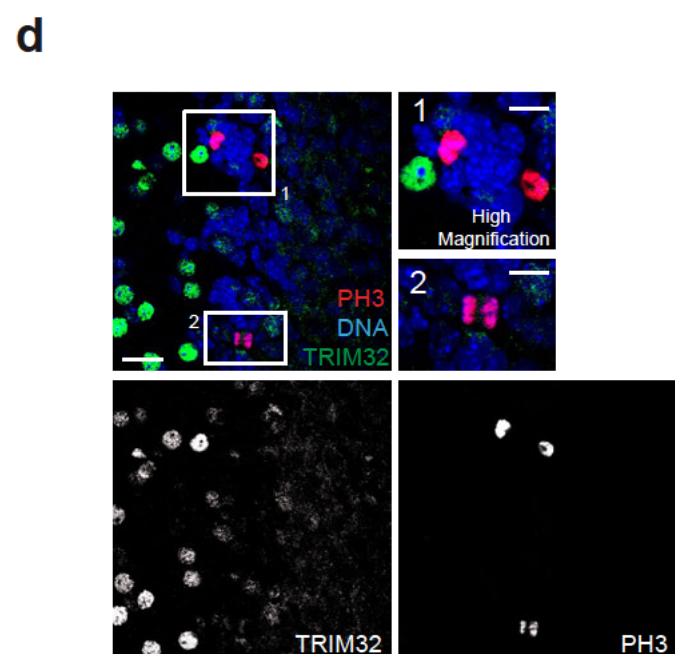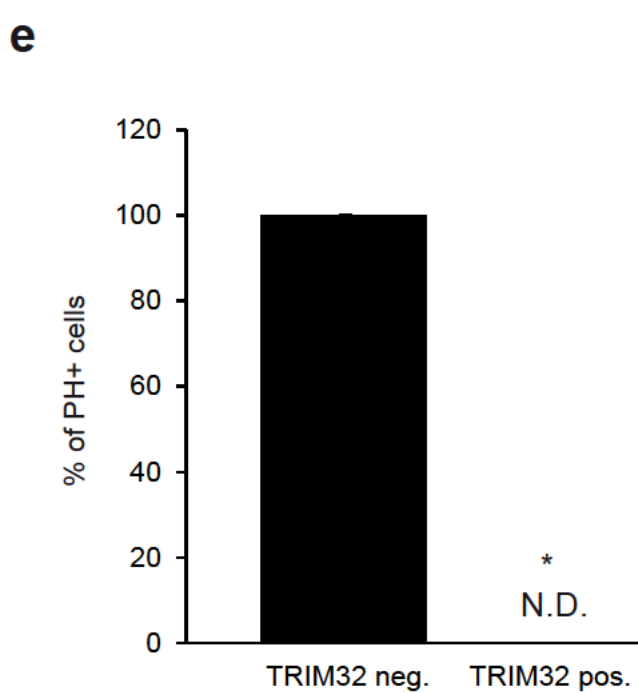

Supplementary Figure 1

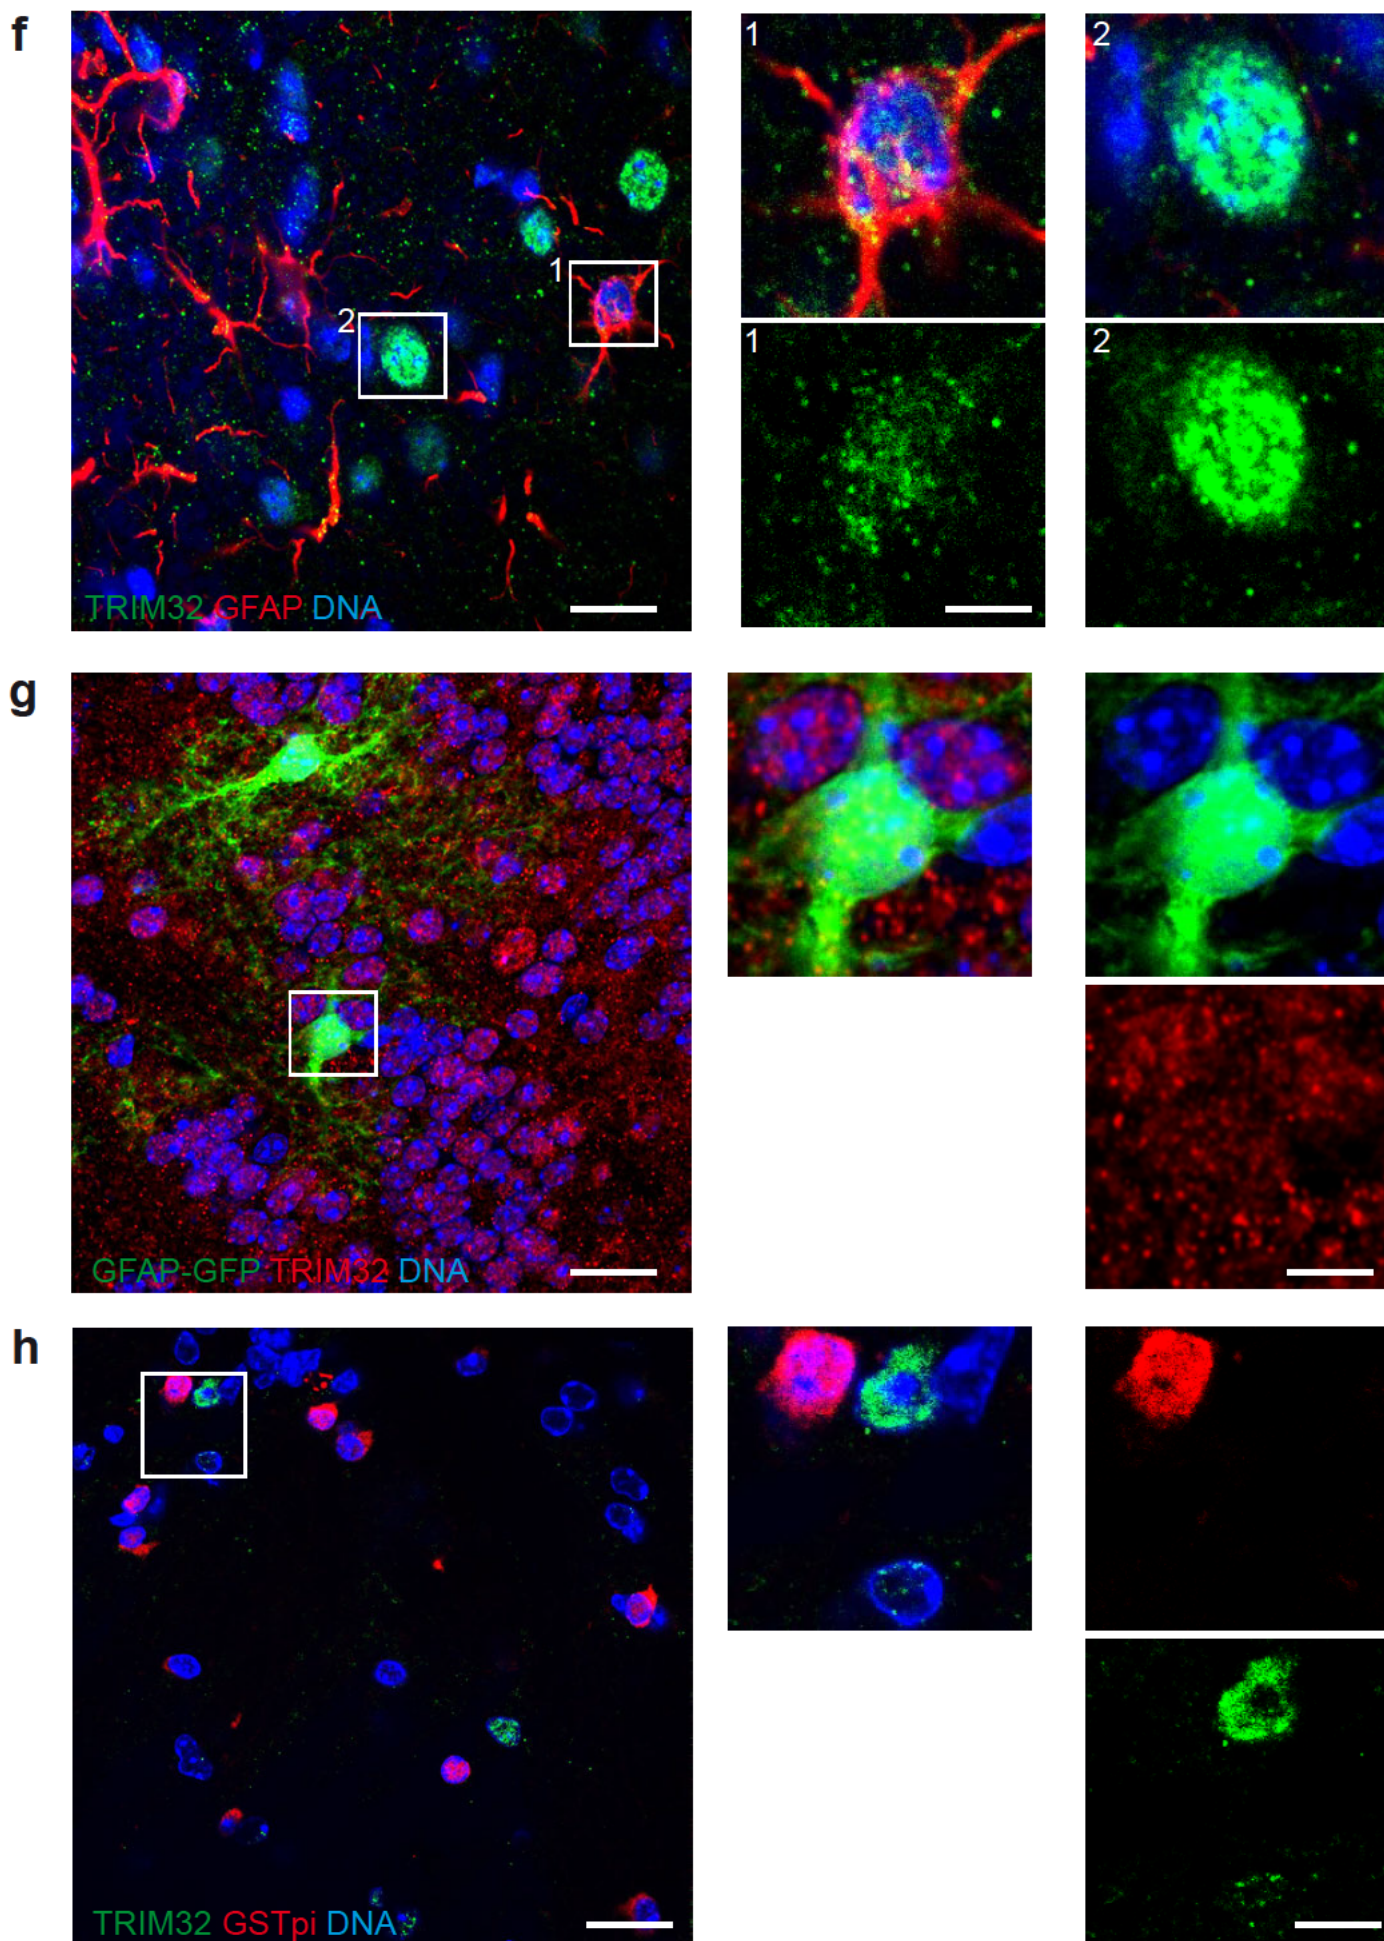

Supplementary Figure 1

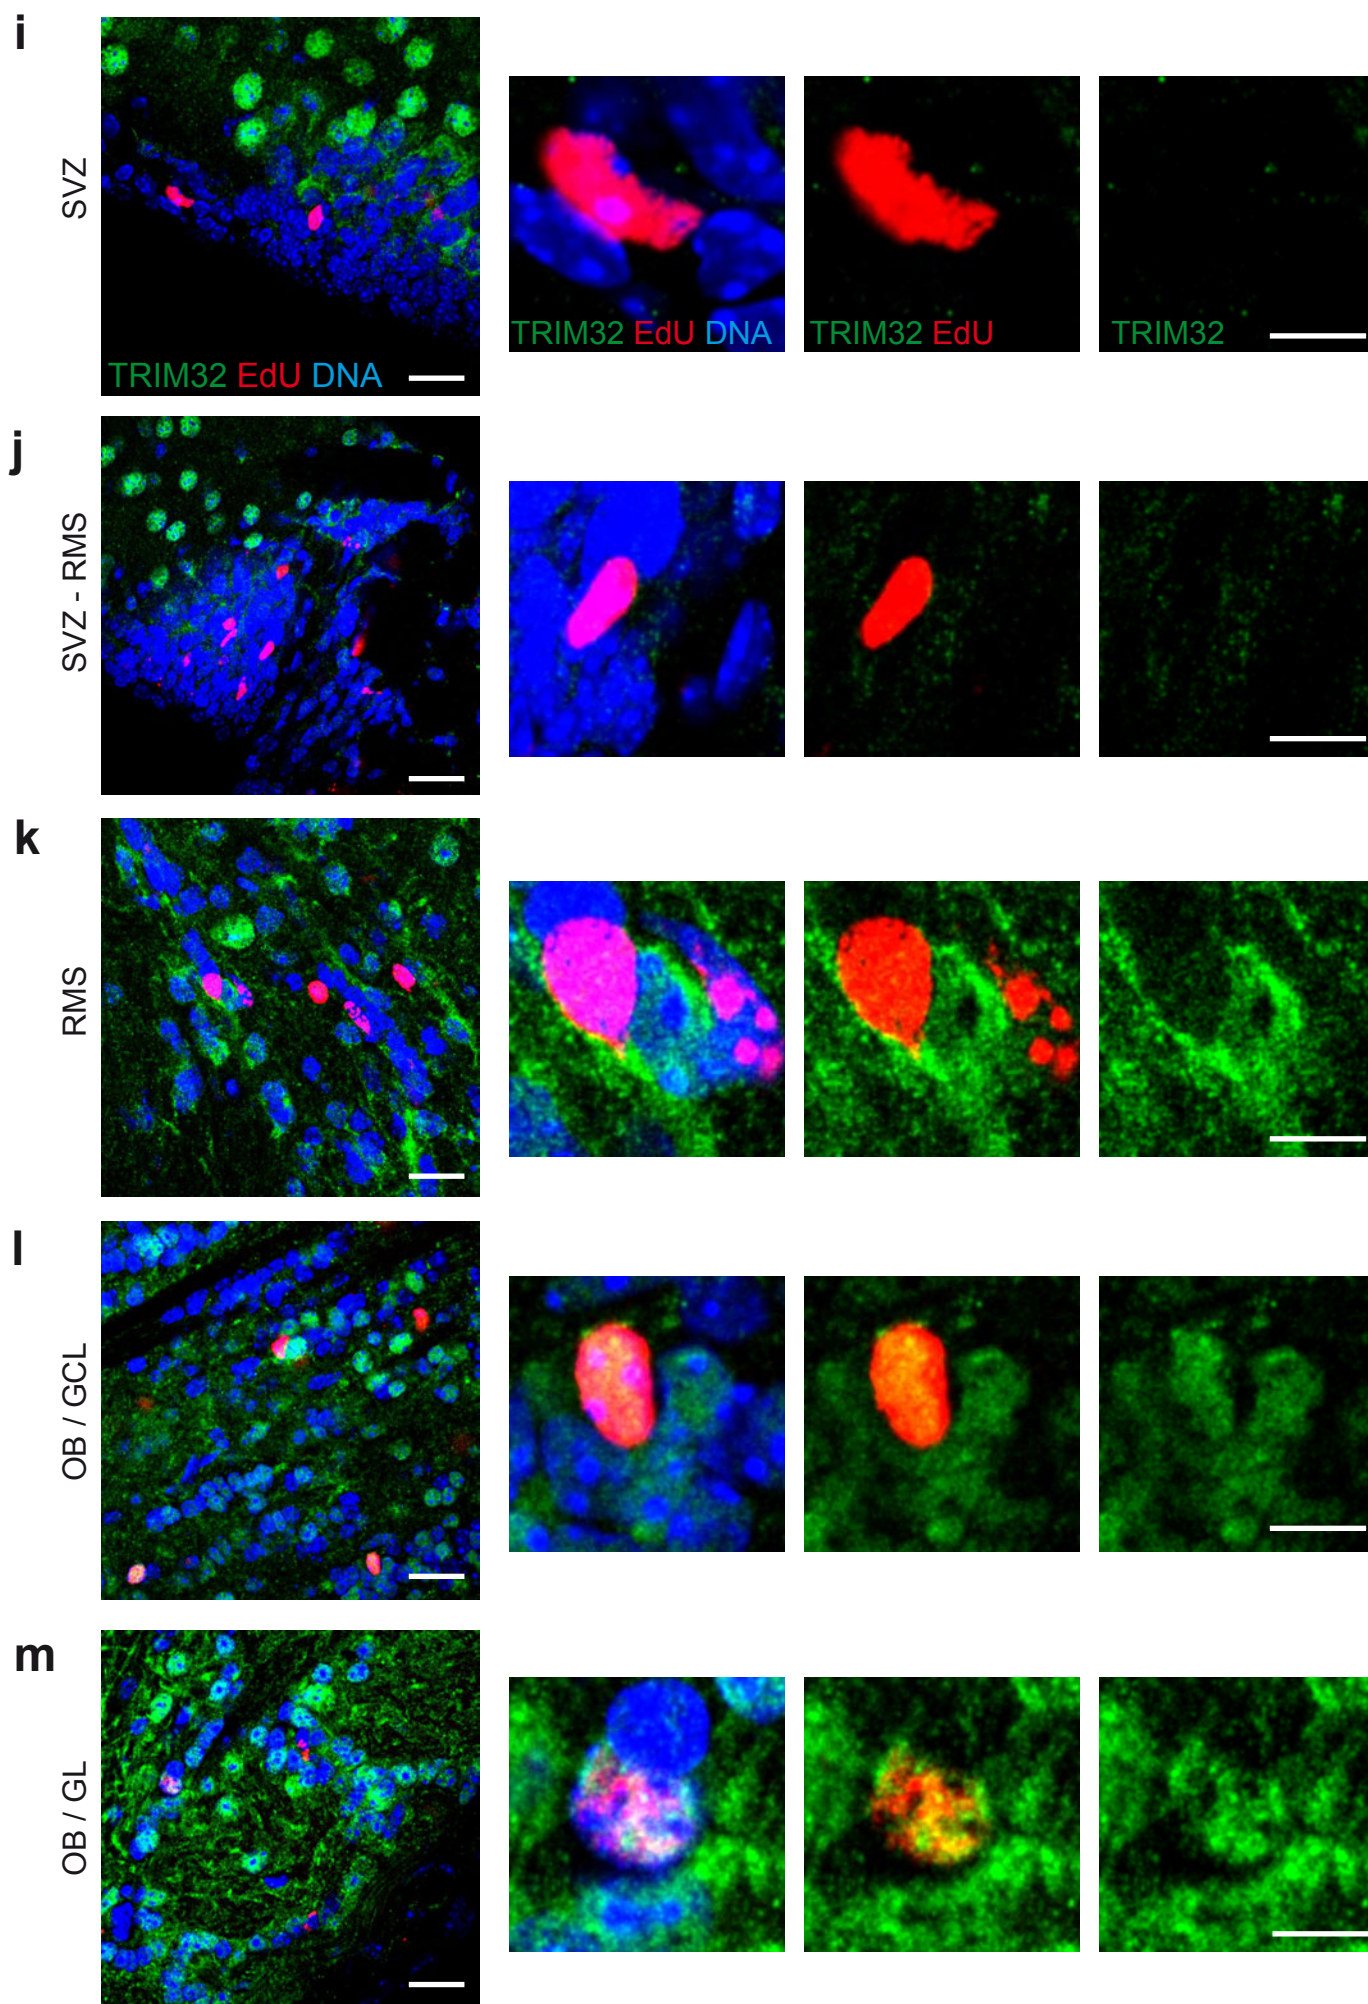

Supplementary Figure 1

n

GCL

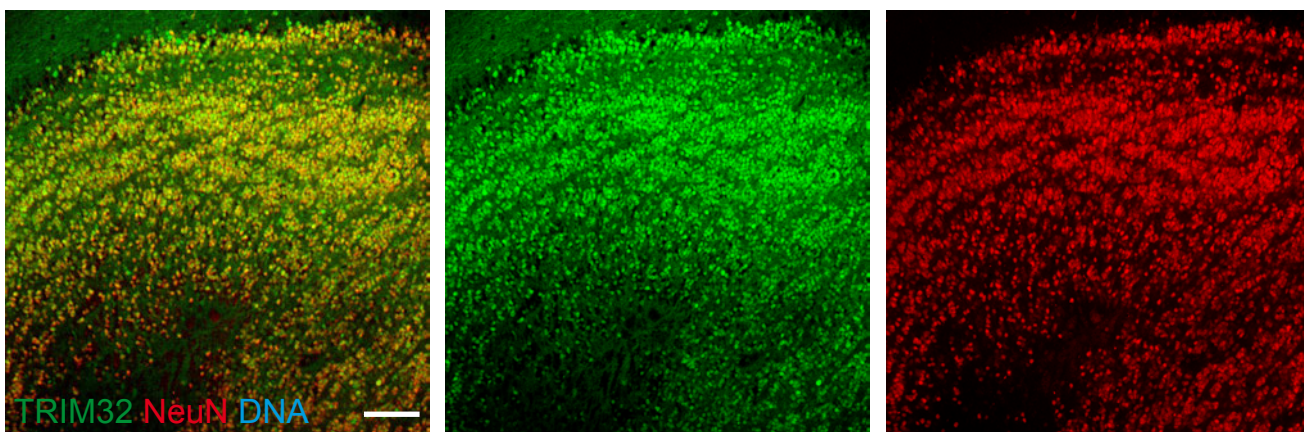

o

GL

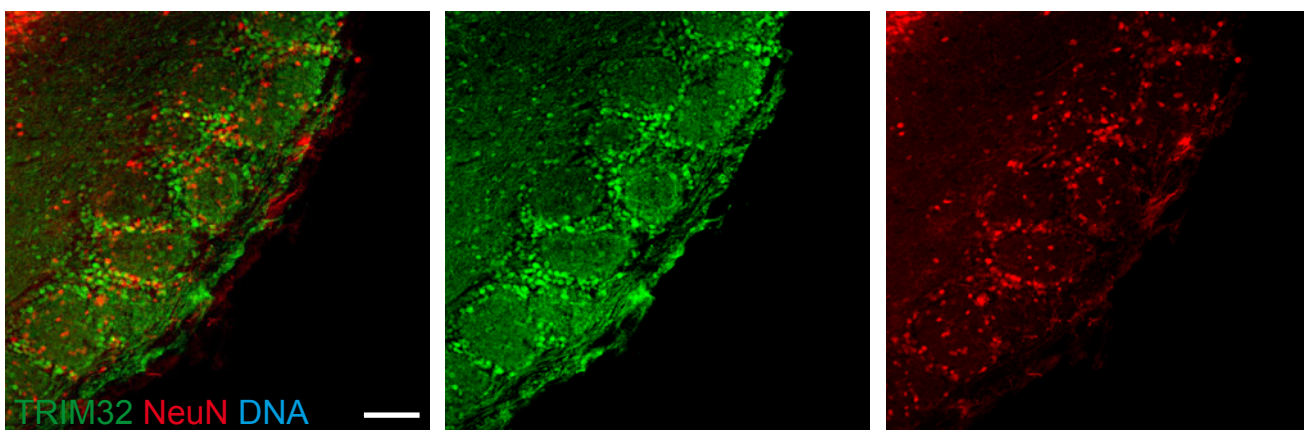

p

GL

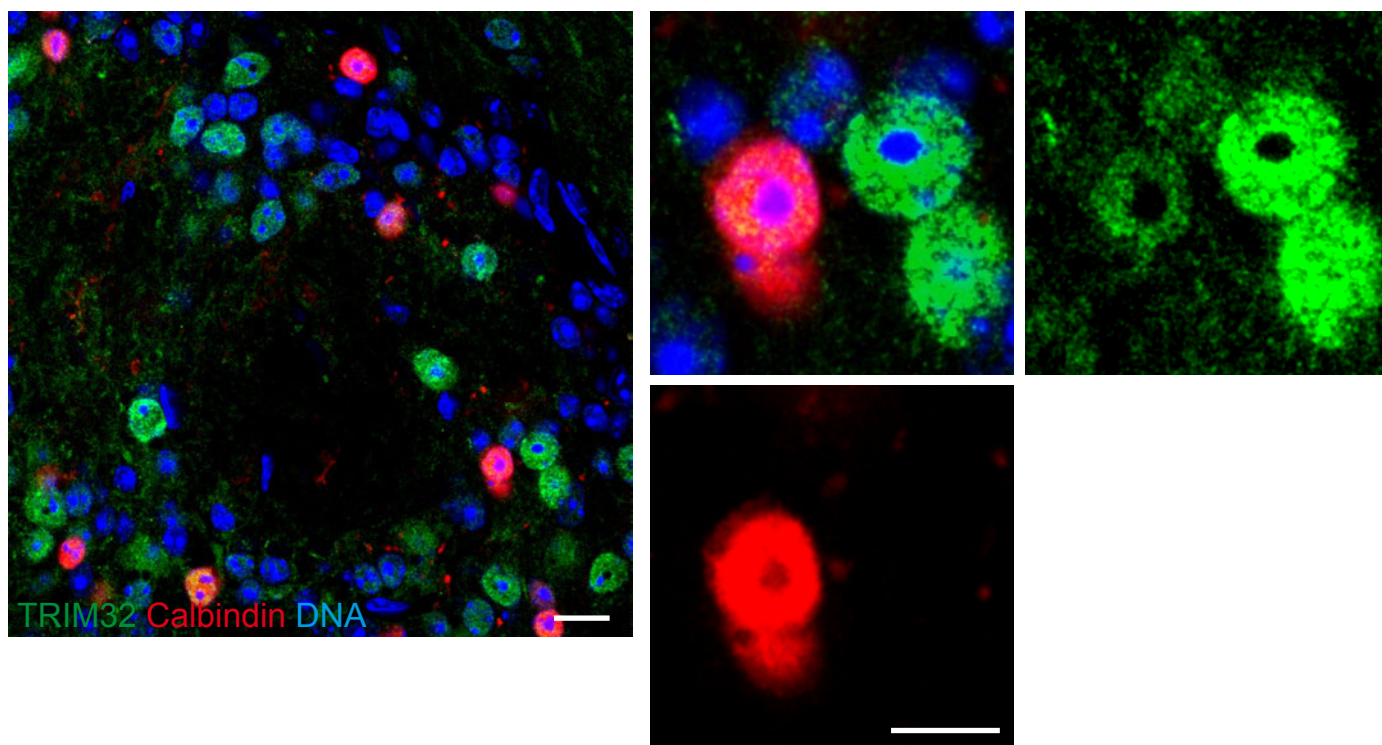

Supplementary Figure 1

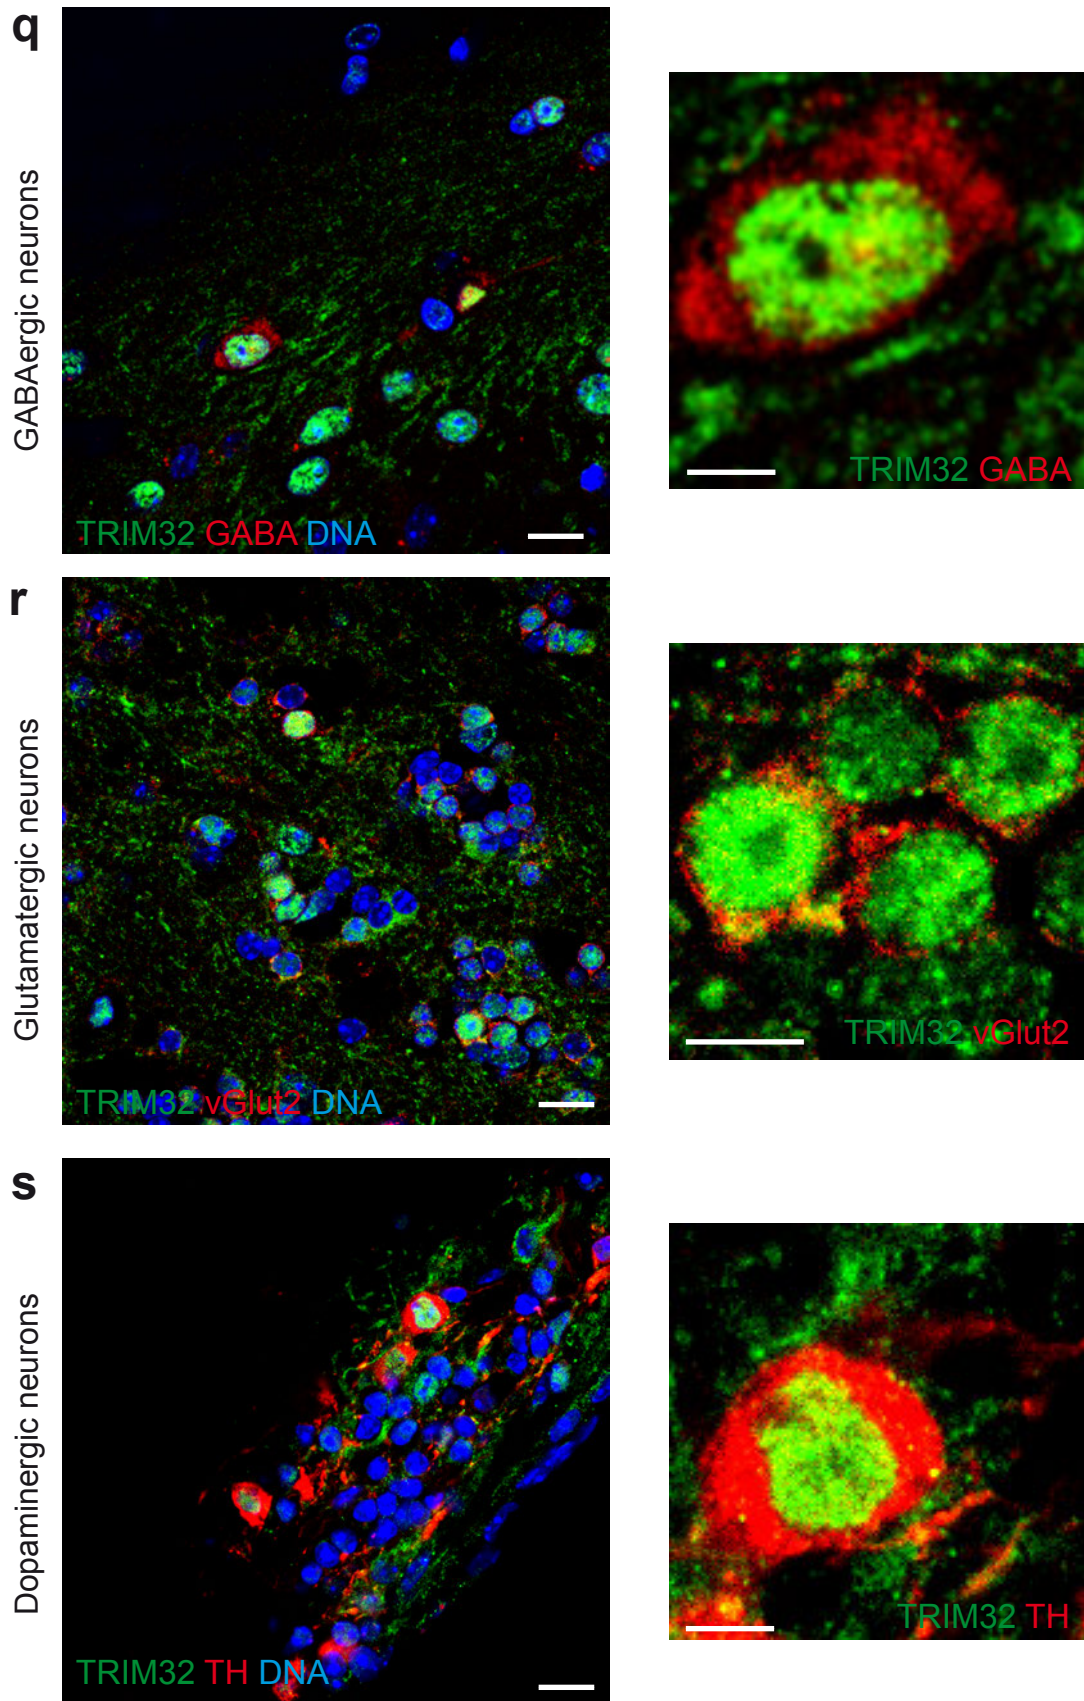

Supplementary Figure 1

**t**

Marmoset OB

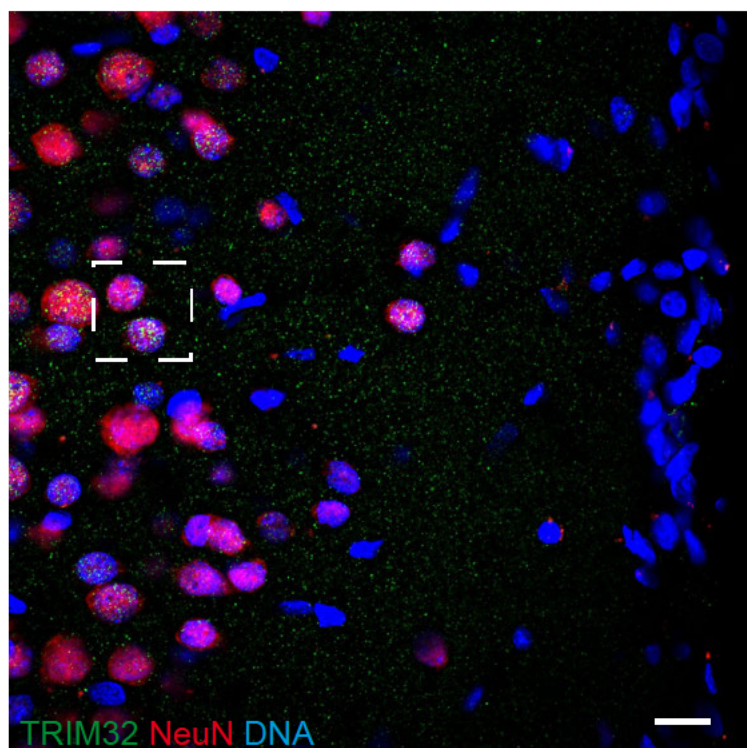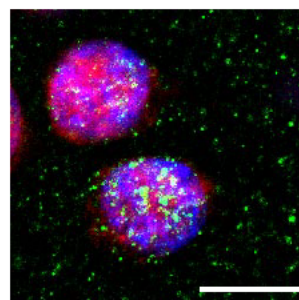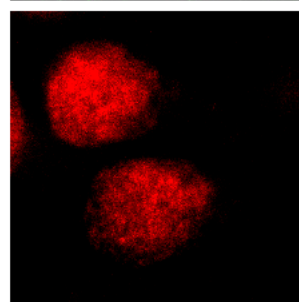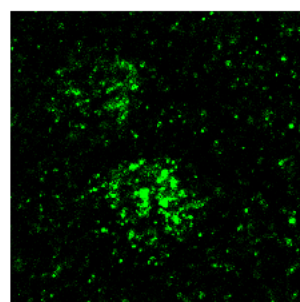**u**

Macaque OB

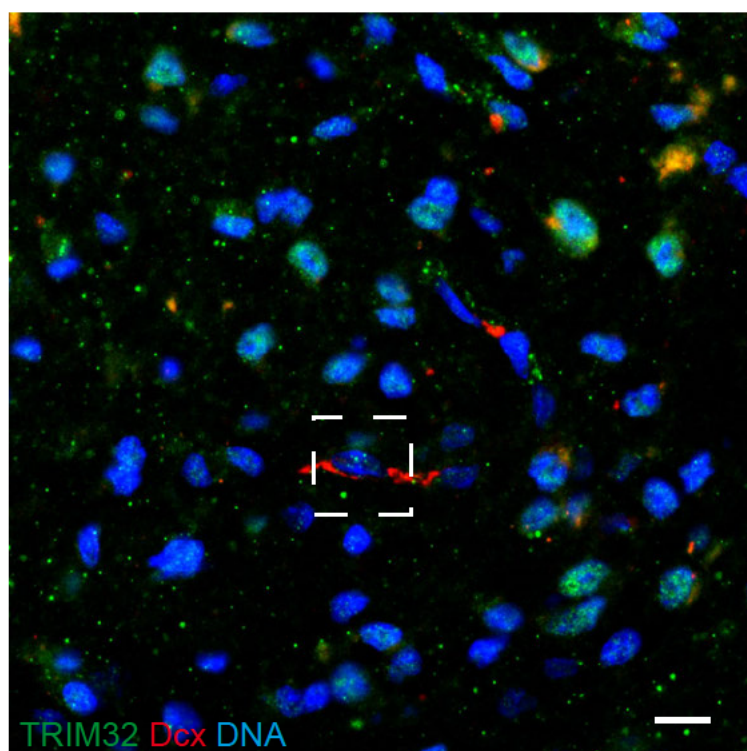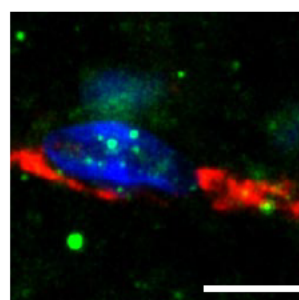

**a**

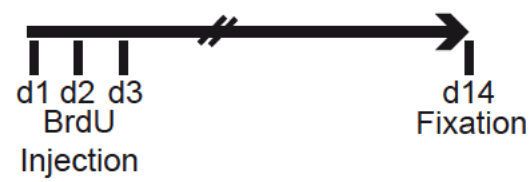

**b**

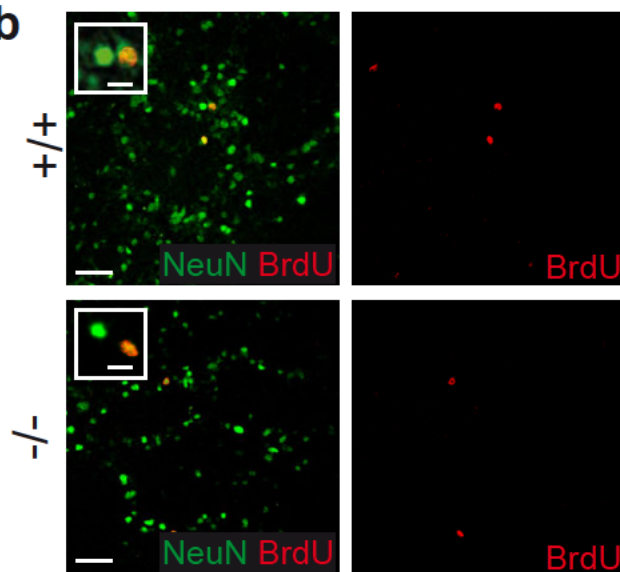

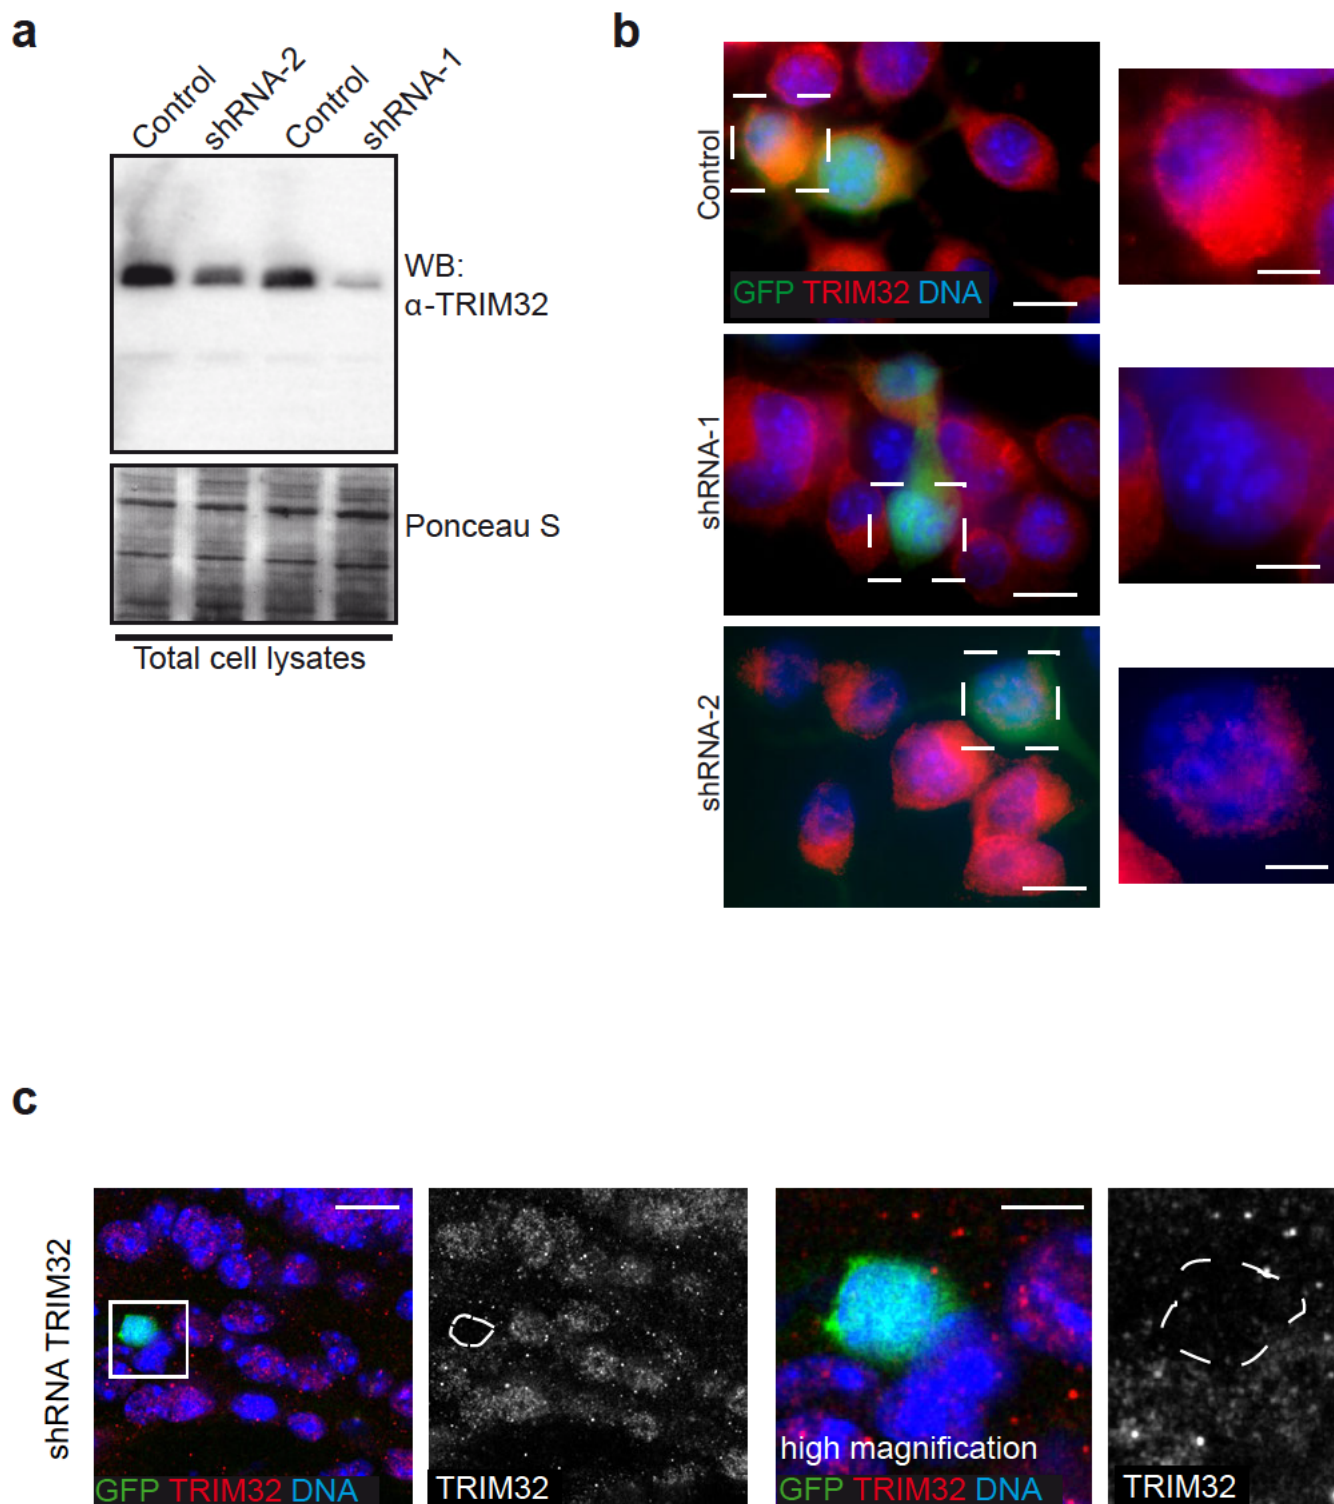

Supplementary Figure 3

**d**

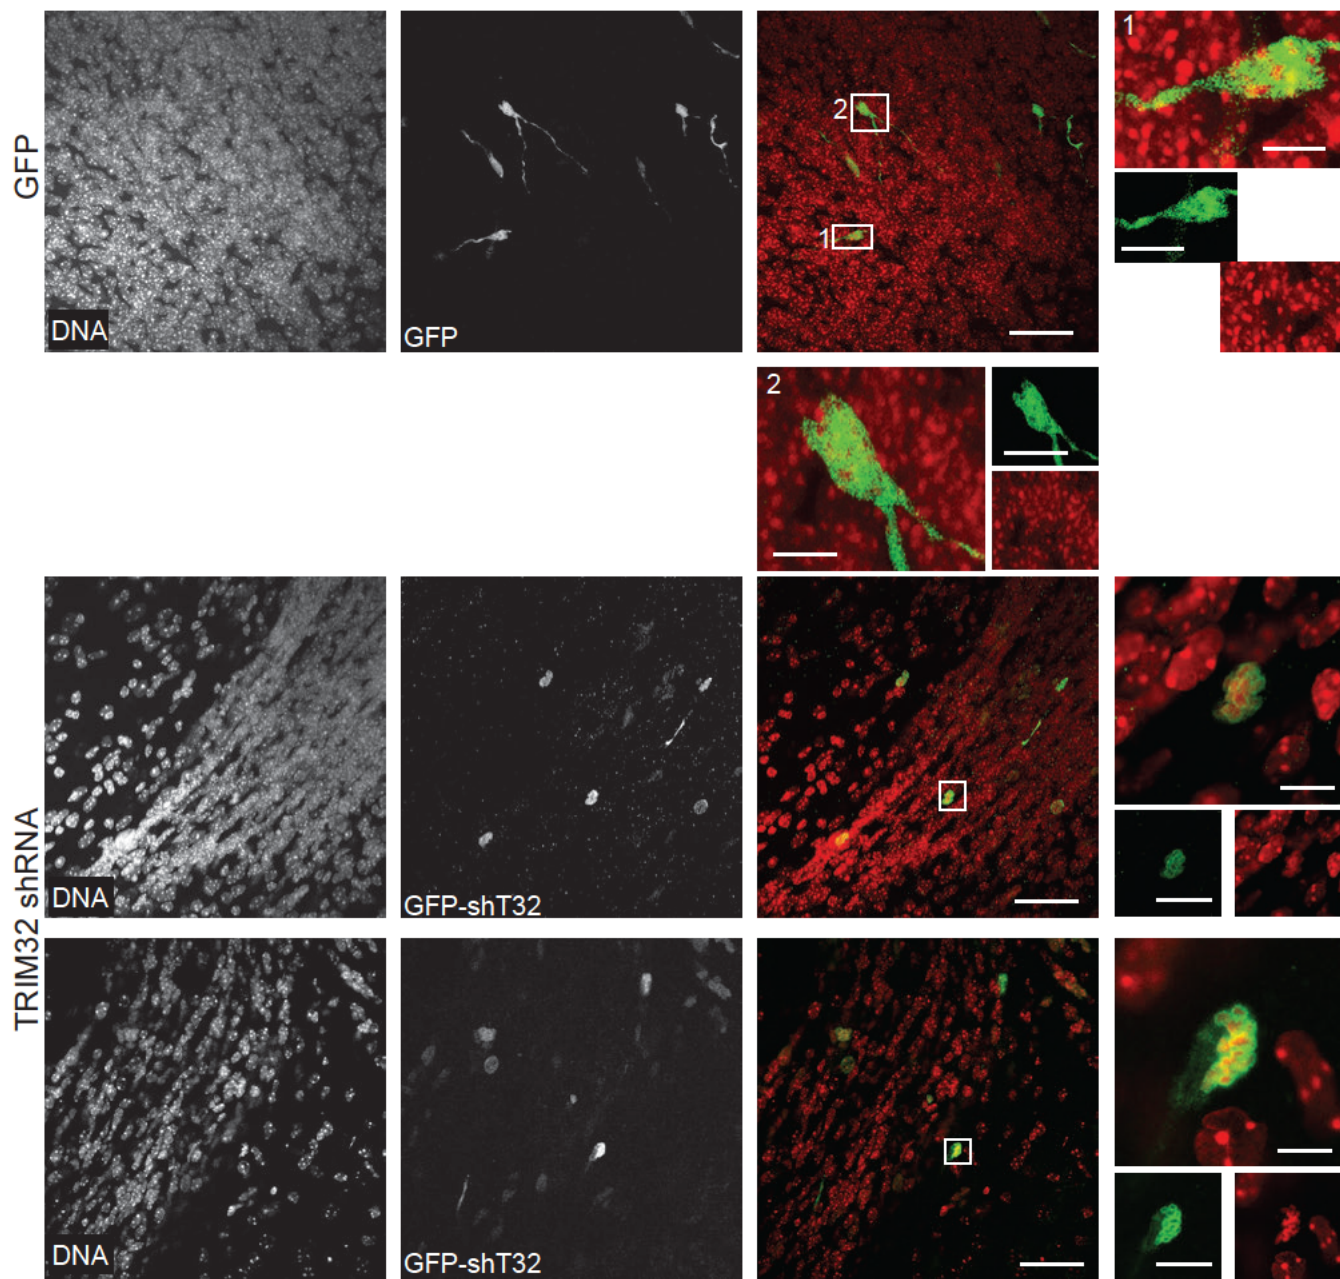

Supplementary Figure 3

**a**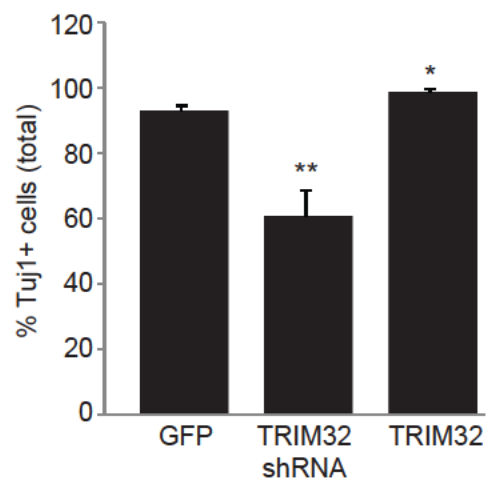**b**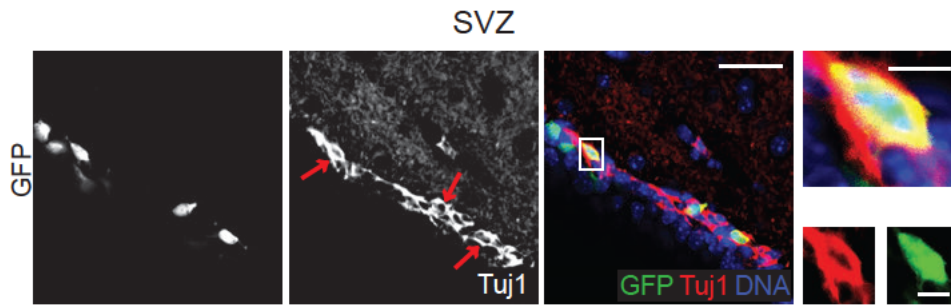**c**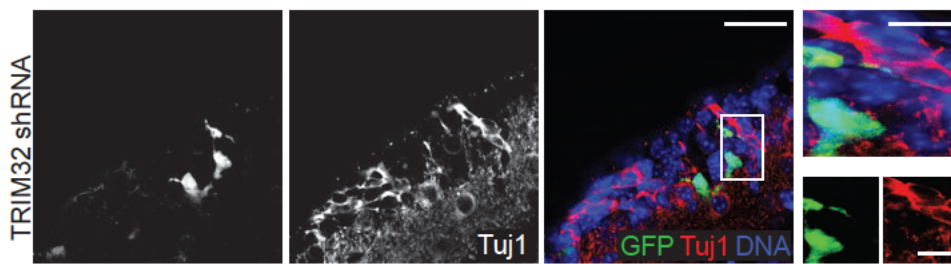**d**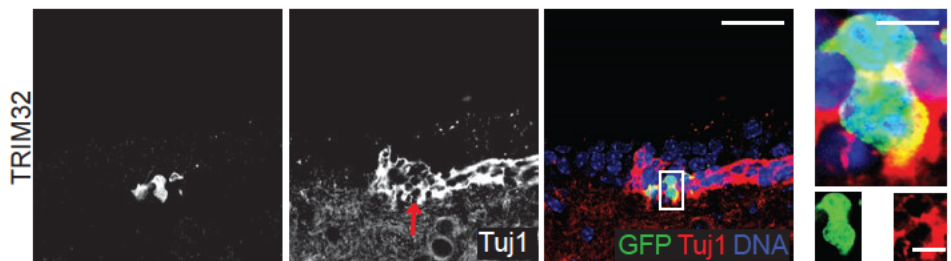**e**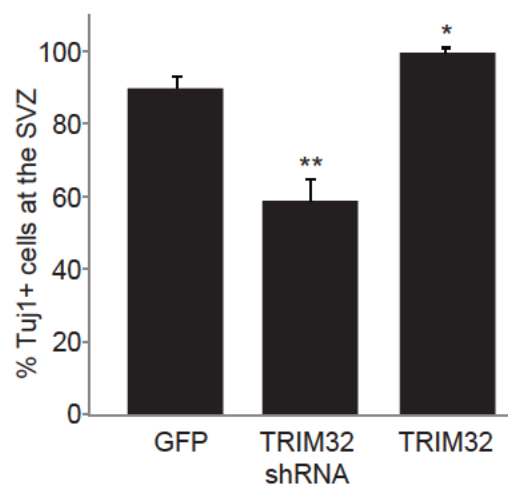

Supplementary Figure 4

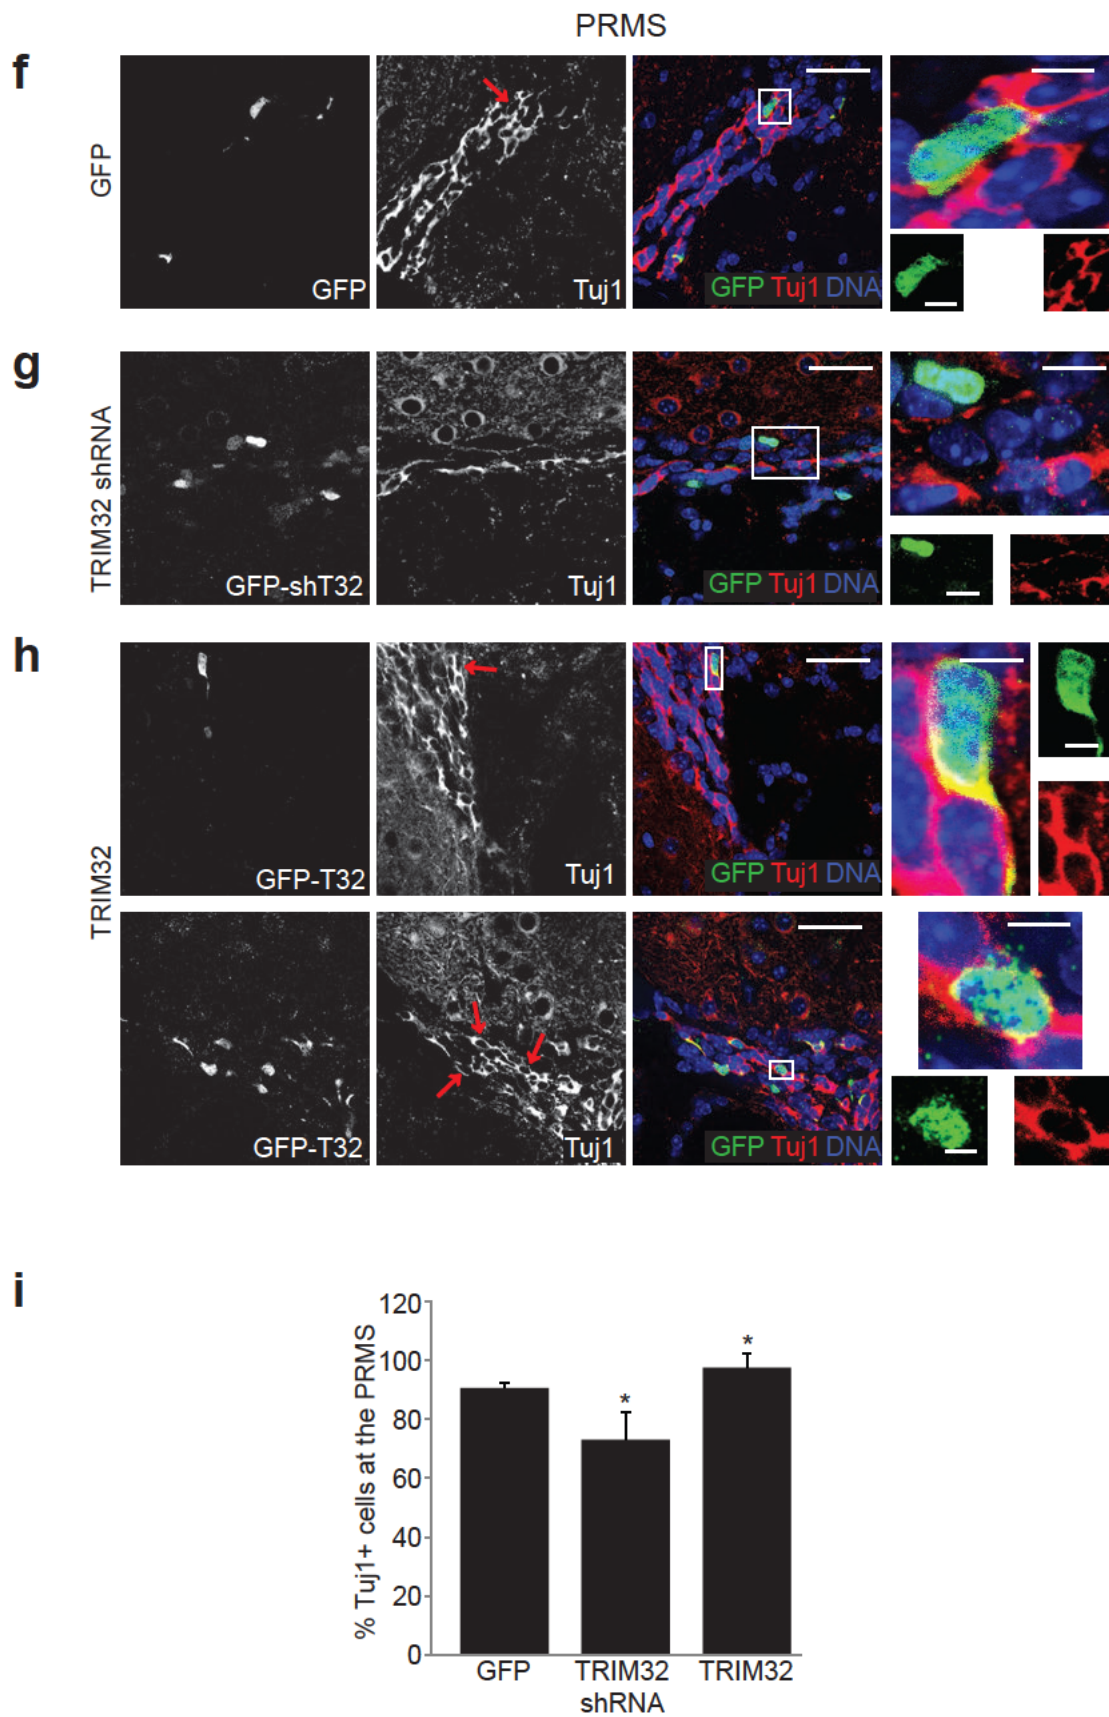

Supplementary Figure 4

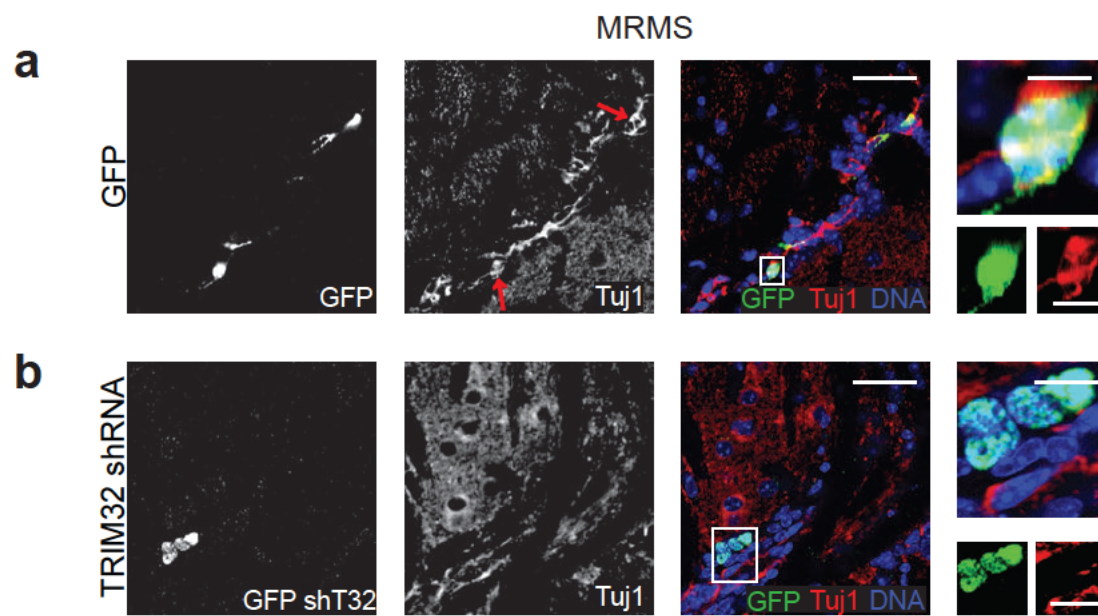

a

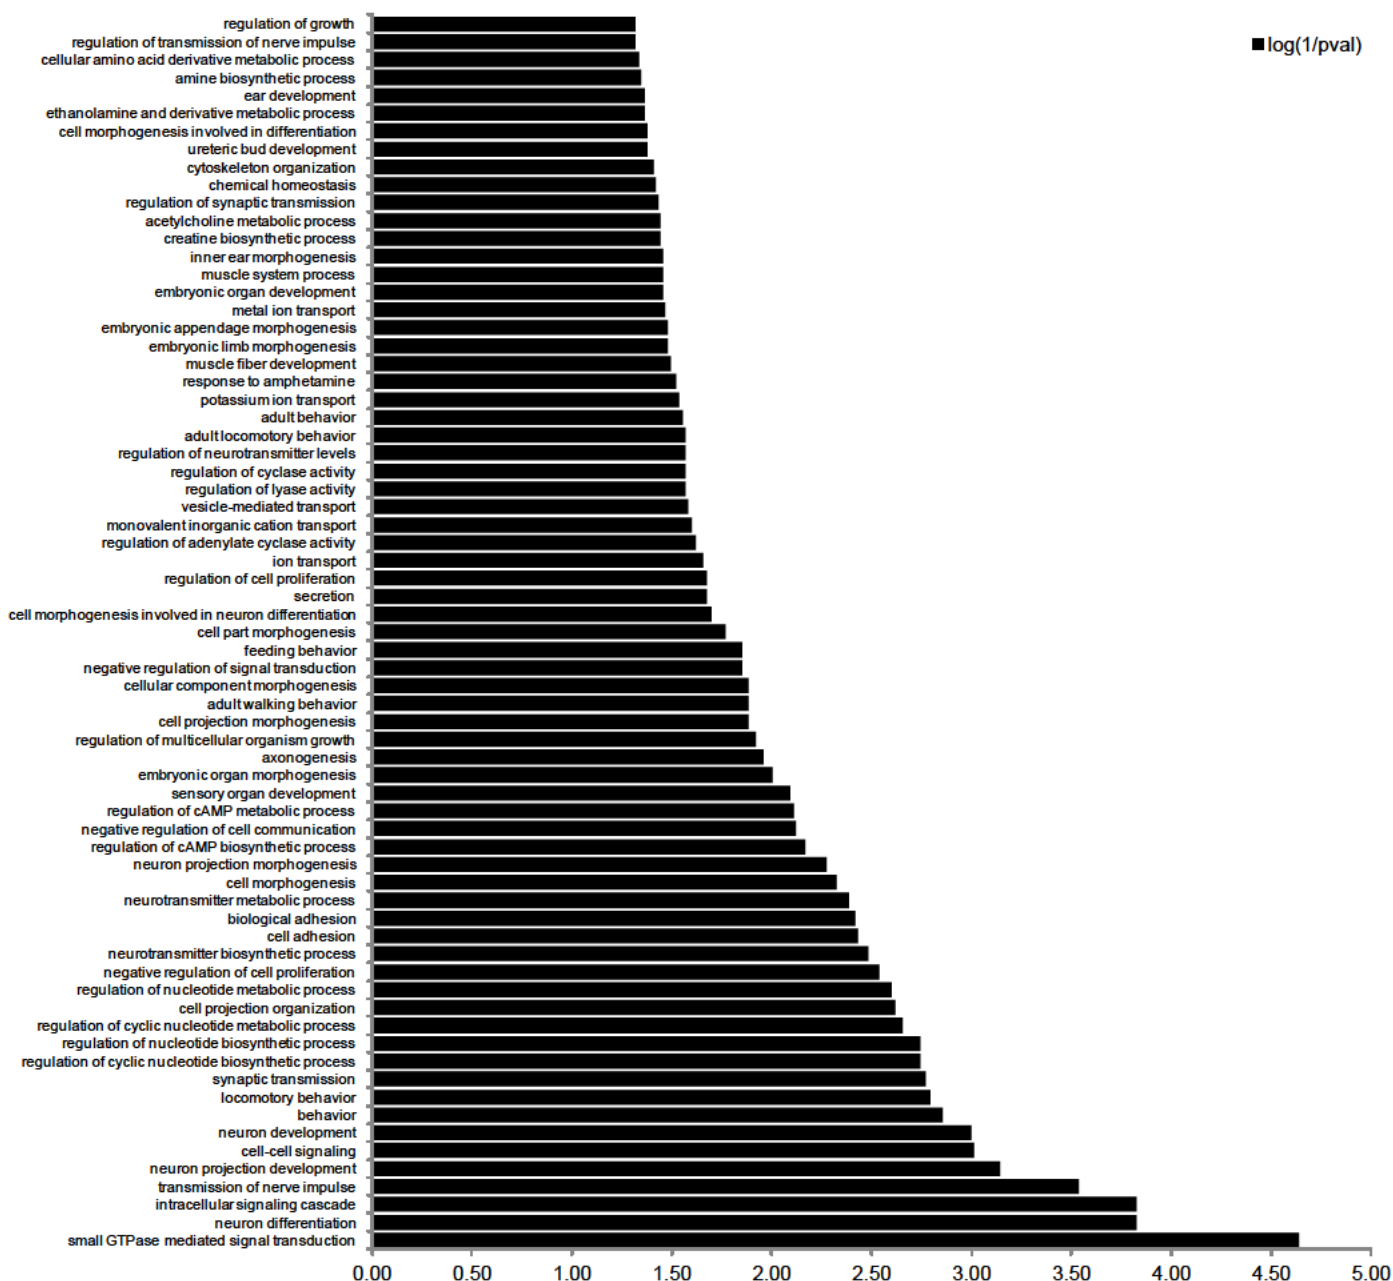

Supplementary Figure 6

**b**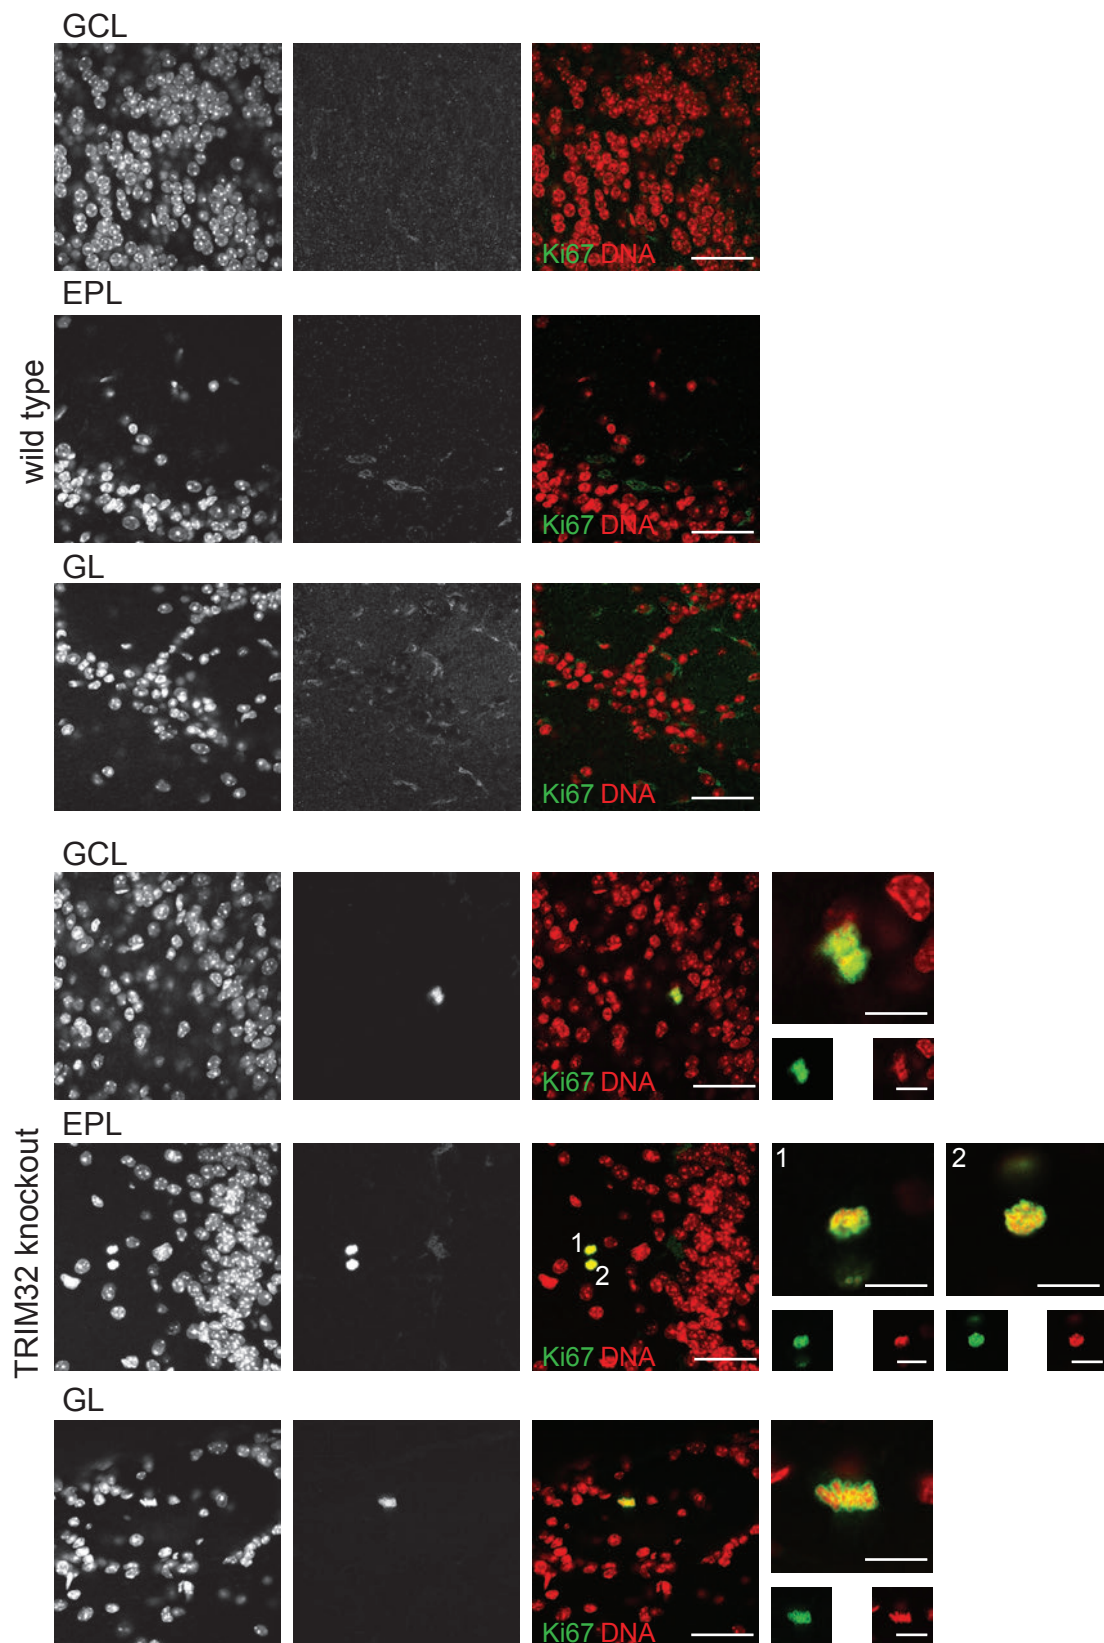

| <b>Cell type<br/>(Marker, Region)</b>                       | <b>% of TRIM32<br/>negative cells<br/>(STDE)</b> | <b>% of TRIM32<br/>weak positive<br/>cells (STDE)</b> | <b>% of TRIM32<br/>strong positive<br/>cells (STDE)</b> |
|-------------------------------------------------------------|--------------------------------------------------|-------------------------------------------------------|---------------------------------------------------------|
| <b>Type B cells/<br/>Astrocytes<br/>(GFAP; SVZ/ OB)</b>     | 90,71 (2,64)                                     | 10,00 (2,60)                                          | 0,00 (0,00)                                             |
| <b>Type C cells<br/>(Mash-1; SVZ/ RMS)</b>                  | 83,71 (3,05)                                     | 0,00 (0,00)                                           | 16,29 (3,05)                                            |
| <b>Mitotically active cells<br/>(Ki67; SVZ/ RMS)</b>        | 78,05 (4,07)                                     | 4,76 (1,70)                                           | 17,20 (2,75)                                            |
| <b>Neuroblasts<br/>(PSA-NCAM, DCX; SVZ)</b>                 | 65,31 (4,09)                                     | 6,21 (2,13)                                           | 23,47 (3,07)                                            |
| <b>Neuroblasts<br/>(PSA-NCAM, DCX; PRMS)</b>                | 67,67 (6,90)                                     | 7,73 (0,79)                                           | 16,90 (2,12)                                            |
| <b>Neuroblasts<br/>(PSA-NCAM, DCX; MRMS)</b>                | 36,82 (10,80)                                    | 73,62 (4,88)                                          | 16,13 (2,26)                                            |
| <b>Neuroblasts<br/>(PSA-NCAM, DCX; DRMS)</b>                | 3,01 (0,44)                                      | 1,87 (1,32)                                           | 91,56 (5,01)                                            |
| <b>Neurons<br/>(NeuN ; GCL)</b>                             | 4,13 (3,55)                                      | 0,00 (0,00)                                           | 95,87 (3,55)                                            |
| <b>Newborn cells<br/>(EdU; GCL)</b>                         | 33,58 (1,98)                                     | 0,00 (0,00)                                           | 66,42 (1,98)                                            |
| <b>Oligodendrocytes<br/>(GST-<math>\pi</math> ; CC, OB)</b> | 97,22 (1,96)                                     | 2,78 (1,96)                                           | 0, 00 (0,00)                                            |

**a**

|       | BrdU (per GCL) |      |
|-------|----------------|------|
| Mouse | +/+            | -/-  |
| 1     | 439            | 766  |
| 2     | 338            | 605  |
| 3     | 235            | 851  |
| 4     | 751            | 1163 |
| Sum:  | 1763           | 3385 |

**b**

|       | BrdU (part of GCL) | BrdU/NeuN |
|-------|--------------------|-----------|
| Mouse | +/+                | +/+       |
| 1     | 140                | 135       |
| 2     | 80                 | 66        |
| 3     | 62                 | 58        |
| 4     | 131                | 121       |
| Sum:  | 413                | 380       |

|       | BrdU (part of GCL) | BrdU/NeuN |
|-------|--------------------|-----------|
| Mouse | -/-                | -/-       |
| 1     | 91                 | 110       |
| 2     | 143                | 156       |
| 3     | 109                | 119       |
| 4     | 172                | 176       |
| Sum:  | 515                | 561       |

**c**

| +/+     |                               |
|---------|-------------------------------|
| Mouse   | TUNEL + cells/mm <sup>2</sup> |
| 1       | 14081446                      |
| 2       | 13214532                      |
| 3       | 19039591                      |
| 4       | 9800462                       |
| Average | 14034007                      |

| -/-     |                               |
|---------|-------------------------------|
| Mouse   | TUNEL + cells/mm <sup>2</sup> |
| 1       | 5637544                       |
| 2       | 5258251                       |
| 3       | 6427305                       |
| 4       | 5902187                       |
| Average | 5806322                       |

**d**

| +/+     |                              |
|---------|------------------------------|
| Mouse   | Casp3+ cells/mm <sup>2</sup> |
| 1       | 6934481                      |
| 2       | 7637175                      |
| 3       | 7341206                      |
| 4       | 6414739                      |
| Average | 7081900                      |

| -/-     |                              |
|---------|------------------------------|
| Mouse   | Casp3+ cells/mm <sup>2</sup> |
| 1       | 2928571                      |
| 2       | 2910053                      |
| 3       | 2248876                      |
| 4       | 2521008                      |
| Average | 2652127                      |

Supplementary Table 2

| <b>cdk inhibitors</b> |                                                                                                         |
|-----------------------|---------------------------------------------------------------------------------------------------------|
| Gene                  | rel. expression difference<br>(Wt <sub>prox -&gt; dist</sub> vs. TRIM32 ko <sub>prox -&gt; dist</sub> ) |
| Cdkn1a                | 32,86                                                                                                   |
| Cdkn2b                | 20,50                                                                                                   |
| Cdkn2a                | 20,13                                                                                                   |

| <b>cyclins</b> |                                                                                                         |
|----------------|---------------------------------------------------------------------------------------------------------|
| Gene           | rel. expression difference<br>(Wt <sub>prox -&gt; dist</sub> vs. TRIM32 ko <sub>prox -&gt; dist</sub> ) |
| Ccnb3          | 37,77                                                                                                   |
| Ccne1          | 22,80                                                                                                   |
| Ccnd1          | 20,86                                                                                                   |

| <b>bcl2-family members and regulators</b> |                                                                                                         |
|-------------------------------------------|---------------------------------------------------------------------------------------------------------|
| Gene                                      | rel. expression difference<br>(Wt <sub>prox -&gt; dist</sub> vs. TRIM32 ko <sub>prox -&gt; dist</sub> ) |
| Bcl6                                      | 43,57                                                                                                   |
| Bcl11b                                    | 34,22                                                                                                   |
| Bok                                       | 27,47                                                                                                   |
| Camkk1                                    | 23,76                                                                                                   |
| Bcl2l11                                   | 23,01                                                                                                   |
| Tox3                                      | 22,13                                                                                                   |
| Bcl2a1c                                   | 22,05                                                                                                   |
| Bmf                                       | 21,97                                                                                                   |
| Mcts1                                     | 21,91                                                                                                   |

Supplementary Table 3

| Brain region | Wild type<br>absolute<br>Ki67+ cell<br>number<br>sum | Wild type<br>absolute<br>Ki67+ cell<br>number<br>mean | S.E.  | TRIM32<br>knockout<br>absolute Ki67+<br>cell number<br>sum | TRIM32<br>knockout<br>absolute Ki67+<br>cell number<br>mean | S.E.  |
|--------------|------------------------------------------------------|-------------------------------------------------------|-------|------------------------------------------------------------|-------------------------------------------------------------|-------|
| <b>SVZ</b>   | 1036                                                 | 259                                                   | 49.53 | 2009                                                       | 502.25                                                      | 47.51 |
| <b>PRMS</b>  | 621                                                  | 155.25                                                | 22.57 | 1867                                                       | 466.75                                                      | 98.1  |
| <b>MRMS</b>  | 169                                                  | 42.25                                                 | 5307  | 729                                                        | 182.25                                                      | 21.5  |
| <b>DRMS</b>  | 10                                                   | 2.5                                                   | 2.18  | 74                                                         | 18.5                                                        | 5.63  |
| <b>OB</b>    | 5                                                    | 1.25                                                  | 0.48  | 127                                                        | 31.75                                                       | 5.81  |

Supplementary Table 4
